# Supplementary material
Source: Springer Nature journal article supplement (https://www.springermedizin.de/resource/supplementary/12990_2007_83_MOESM2_ESM.pdf/9612620)

# C-fibre terminal

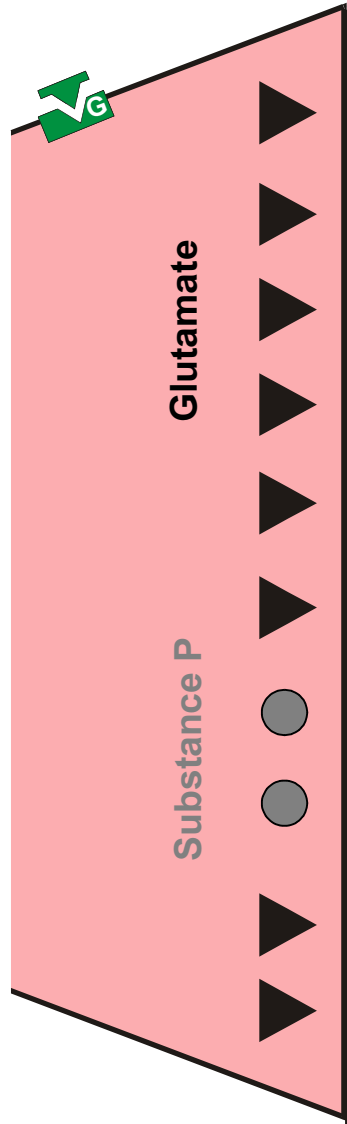

# Lamina I projection neuron

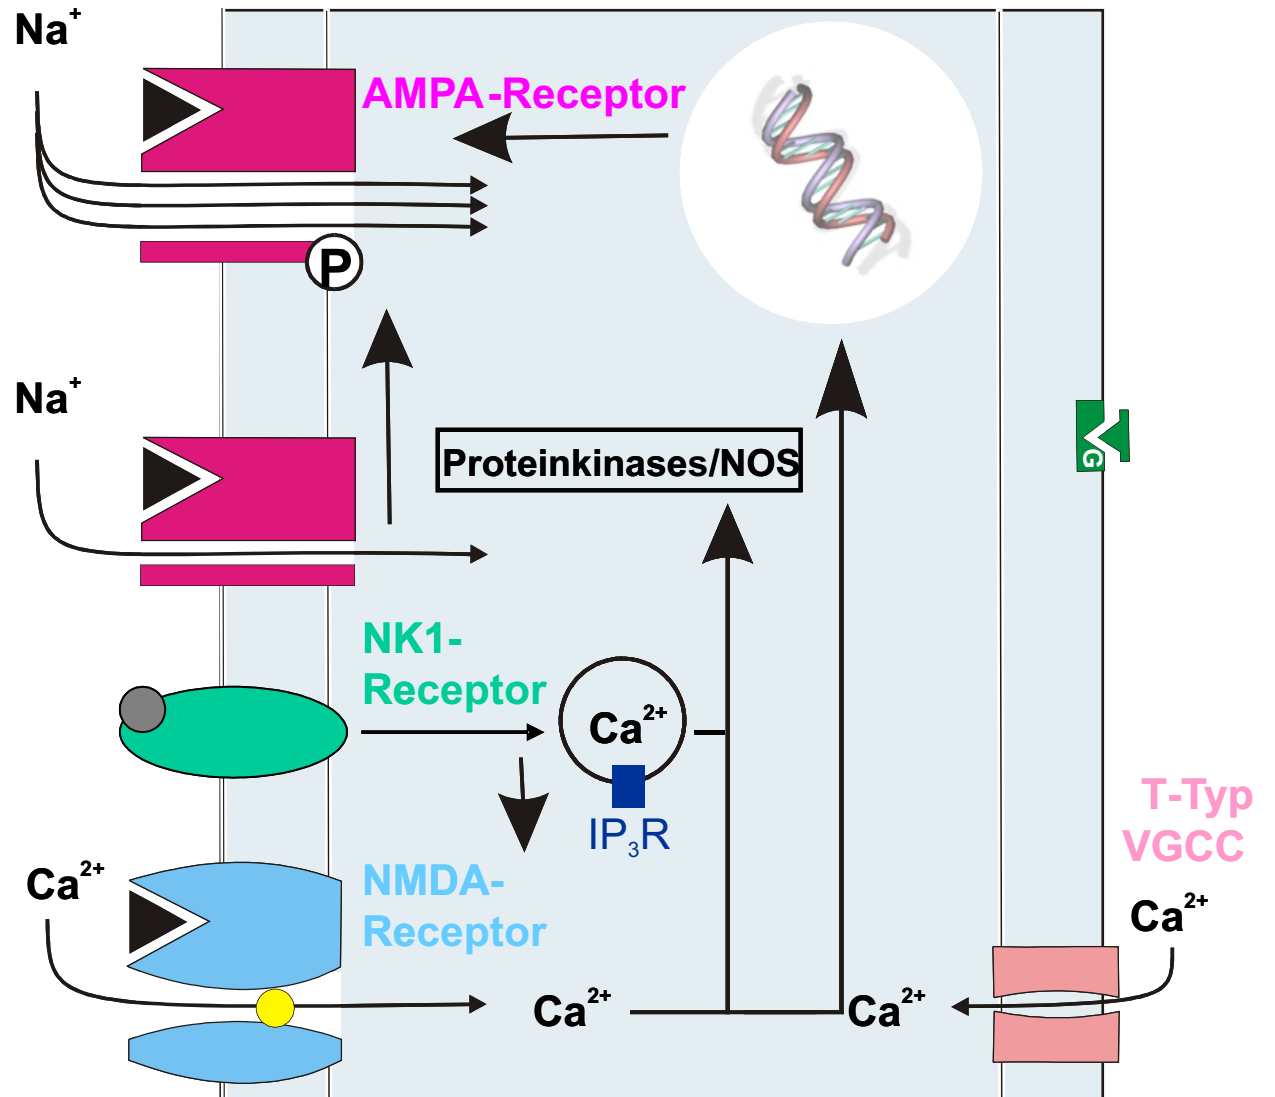

Supplement: MOESM2 [file 9612620]
